# Supplementary material for: Component-based biocompatibility and safety evaluation of polysorbate 80
Source: Royal Society of Chemistry journal article supplement (doi:10.1039/c6ra27242h), 2017-01-01
Supplement: c6ra27242h1.pdf [file c6ra27242h1.pdf]

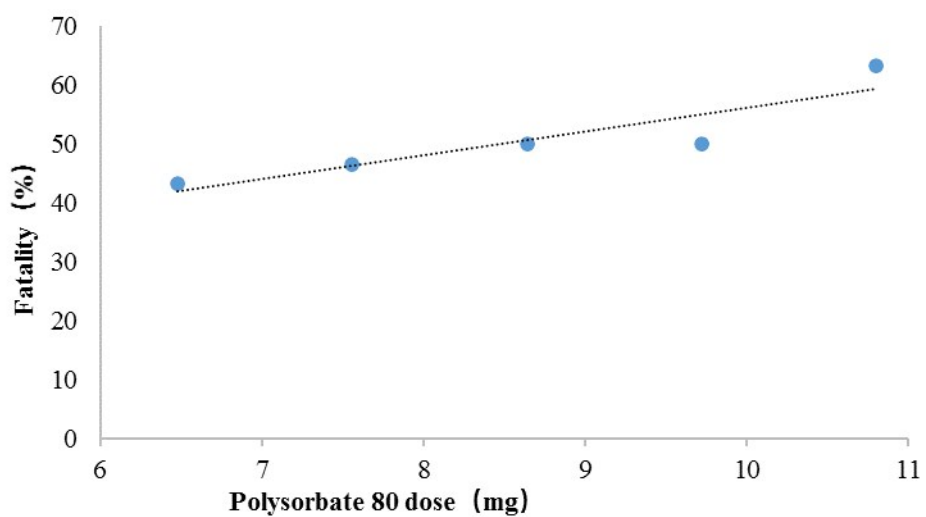

**Fig. S1** Mortality curve of zebrafish subjected to polysorbate 80 (No. 1) at different dosages.

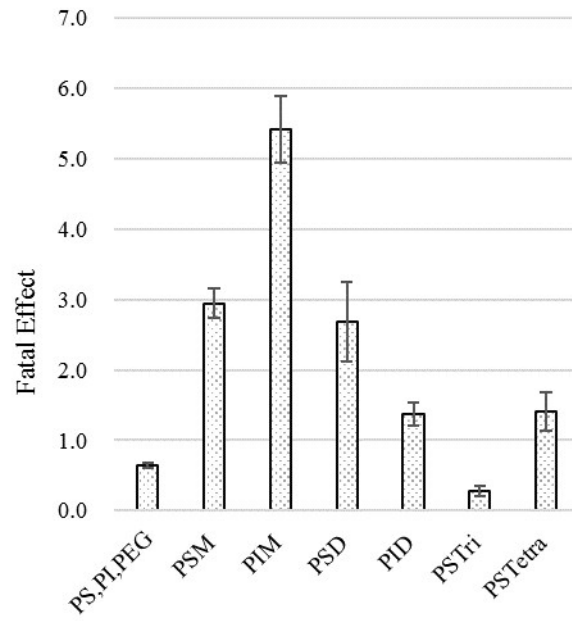

**Fig. S2** Estimated proportion-based fatal effects of major components of polysorbate 80 on zebrafish

| A         | Time(min) | Peak Area | Peak Area(%) |
|-----------|-----------|-----------|--------------|
| PEG,PS,PI | 1.437     | 112.2     | 100.000      |

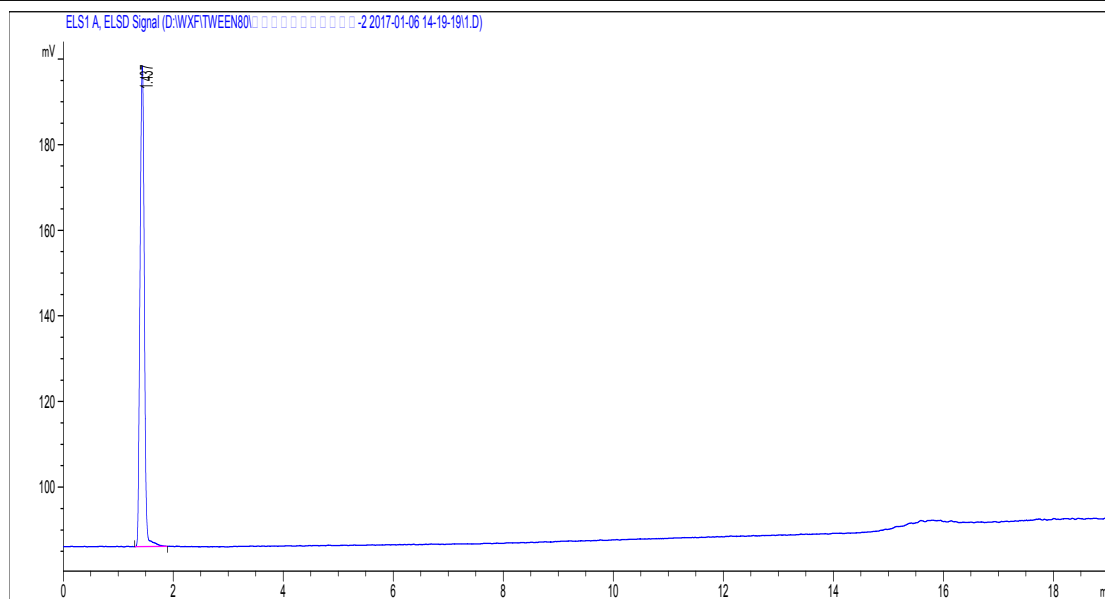

**Fig. S3 Chromatogram of constitute A (PEG, PS and PI) and its purity**

| B   | Time(min) | Peak Area | Peak Area(%) |
|-----|-----------|-----------|--------------|
| PSM | 1.592     | 1688.6    | 95.284       |

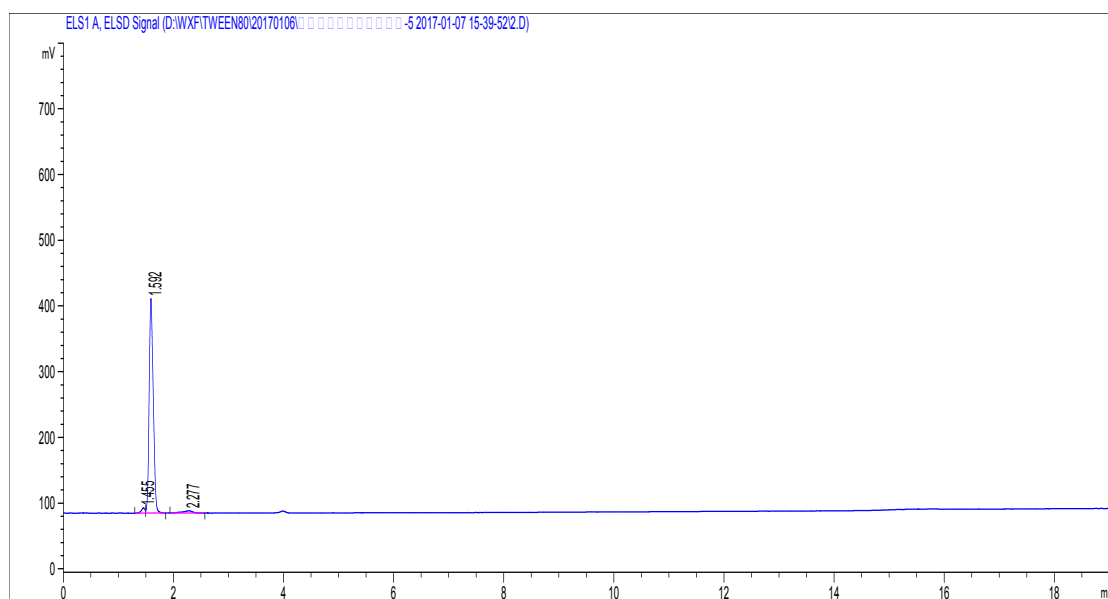

**Fig. S4 Chromatogram of constitute B (PSM) and its purity**

| C   | Time(min) | Peak Area | Peak Area(%) |
|-----|-----------|-----------|--------------|
| PIM | 1.816     | 1182.7    | 95.354       |

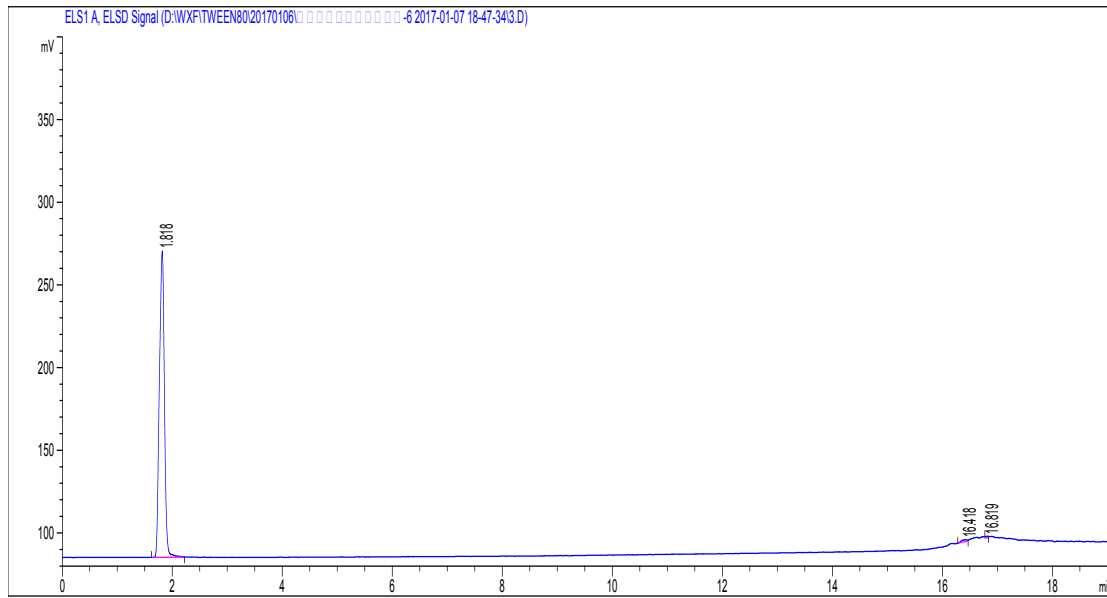

**Fig. S5 Chromatogram of constitute C (PIM) and its purity**

| D   | Time(min) | Peak Area | Peak Area(%) |
|-----|-----------|-----------|--------------|
| PSD | 6.346     | 33597.5   | 99.532       |

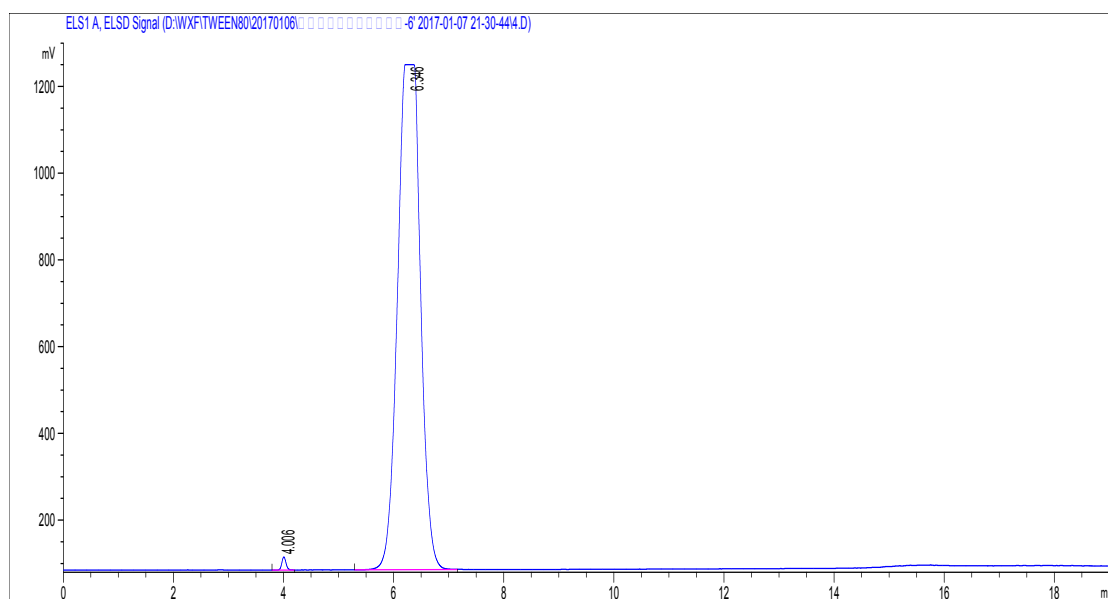

**Fig. S6 Chromatogram of constitute D (PSD) and its purity**

| E   | Time(min) | Peak Area | Peak Area(%) |
|-----|-----------|-----------|--------------|
| PID | 8.51      | 1576.2    | 95.509       |

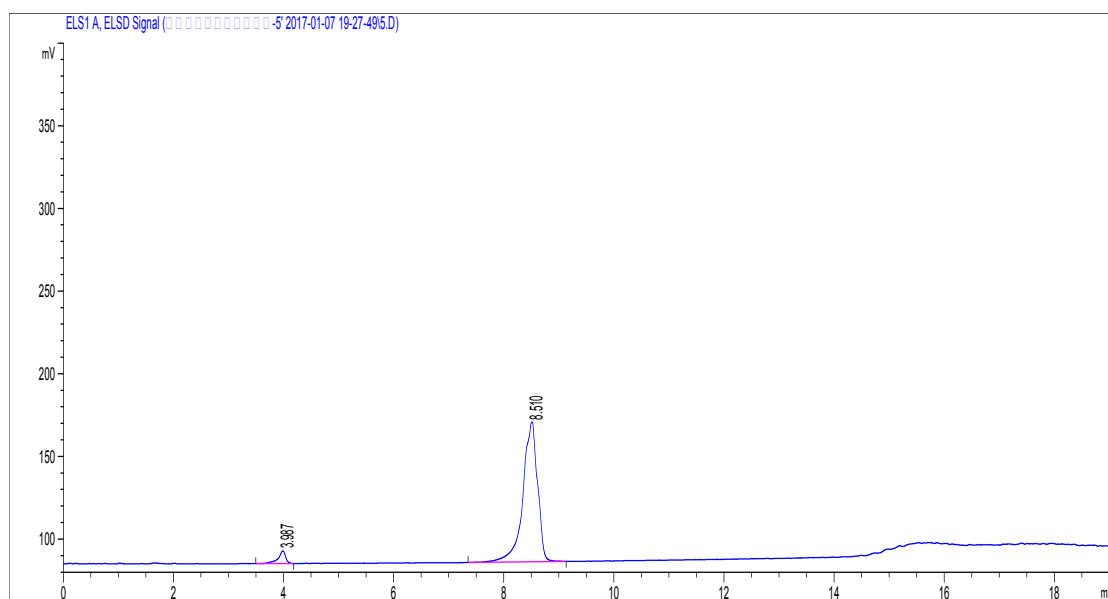

**Fig. S7 Chromatogram of constitute E (PID) and its purity**

| F     | Time(min) | Peak Area | Peak Area(%) |
|-------|-----------|-----------|--------------|
| PSTri | 10.833    | 4225.4    | 96.512       |

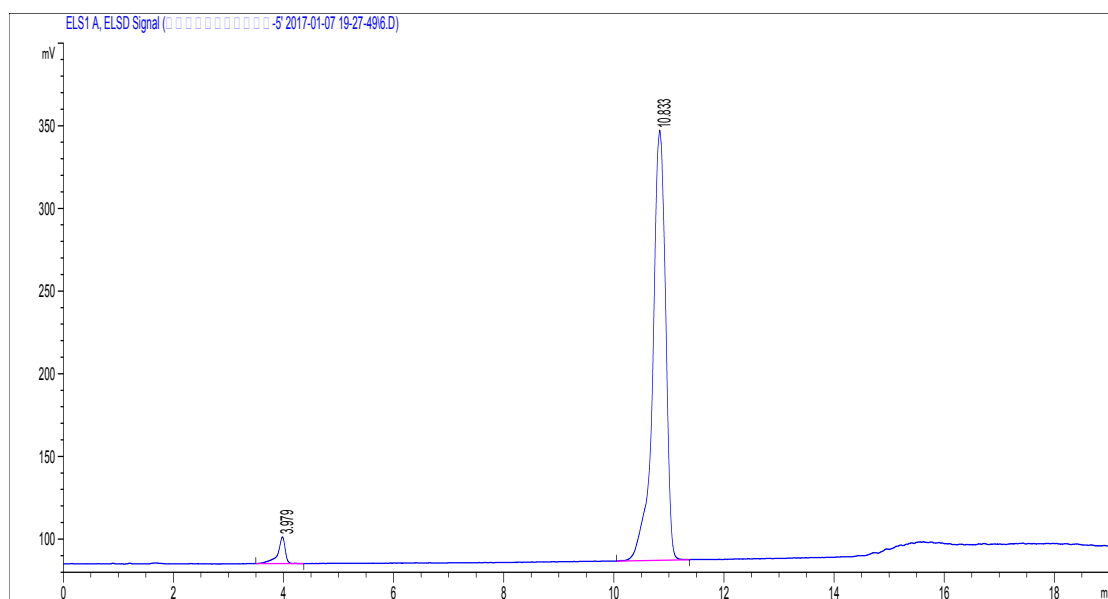

**Fig. S8 Chromatogram of constitute F (PSTri) and its purity**



| G       | Time(min) | Peak Area | Peak Area(%) |
|---------|-----------|-----------|--------------|
| PSTetra | 12.992    | 8098.8    | 99.269       |

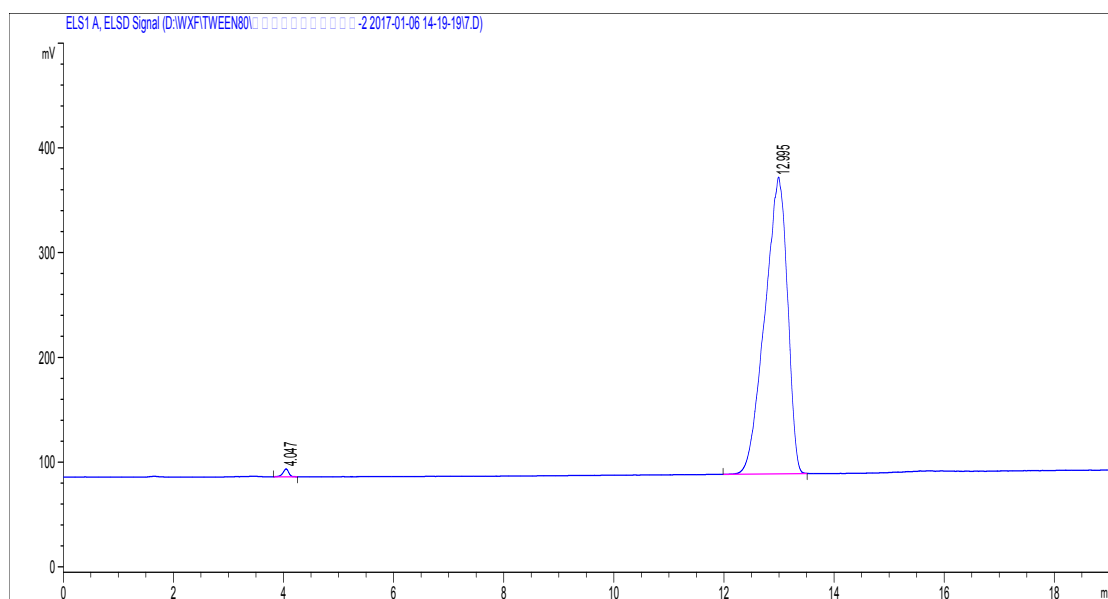

**Fig. S9 Chromatogram of constitute G (PSTetra) and its purity**
